# Supplementary material for: Fido-SNP: the first webserver for scoring the impact of single nucleotide variants in the dog genome
Source: PubMed Central journal article supplement — Nucleic Acids Res. 2019 May 22;47(W1):W136–41. doi: 10.1093/nar/gkz420 (PMC6602425; doi:10.1093/nar/gkz420), 2019-05-22
Supplement: gkz420_supplemental_files.pdf [file gkz420_supplemental_files.pdf]

## SUPPLEMENTARY MATERIALS

### **Fido-SNP: The first webserver for scoring the impact of single nucleotide variants in the dog genome**

Emidio Capriotti<sup>1§\*</sup>, Ludovica Montanucci<sup>2§</sup>, Giuseppe Profiti<sup>3</sup>, Ivan Rossi<sup>3</sup>,  
Diana Giannuzzi<sup>2</sup>, Luca Aresu<sup>4</sup> and Piero Fariselli<sup>2,5\*</sup>

<sup>1</sup> BioFold Unit, Department of Pharmacy and Biotechnology (FaBiT), University of Bologna, Via F. Selmi 3, 40126 Bologna, Italy.

<sup>2</sup> Department of Comparative Biomedicine and Food Science. University of Padova, Viale dell'Università, 16, 35020 Legnaro (Padova), Italy.

<sup>3</sup> BioDec srl. Via Calzavecchio 20, 40033 Casalecchio di Reno (Bologna), Italy.

<sup>4</sup> Department of Veterinary Sciences, University of Torino, Largo P. Braccini 2, 10095 Grugliasco, (Torino), Italy.

<sup>5</sup> Department of Medical Sciences, University of Torino, Via Santena 19, 10126, Torino, Italy.

\* To whom correspondence should be addressed. Tel: +39 051 2094303; Fax: +39 051 209 4286 ; Email: E.C. (emidio.capriotti@unibo.it) and P.F. (piero.fariselli@unito.it).

§ These authors equally contributed to this work.

#### **Evaluation measures for binary classifiers**

Fido-SNP prediction output ( $\bar{s}$ ) is rescaled around a threshold of 0.1 using the following equations.

$$\left[ \begin{array}{ll} s = 0.5 \times \bar{s} & \bar{s} < 0.5 \\ s = \frac{5}{9} \times \bar{s} + 0.5 & \bar{s} \geq 0.5 \end{array} \right. \quad [1]$$

For each prediction, the binary classification (*Pathogenic/Benign*) is made at the output threshold ( $s$ ). Thus, if probability of *Pathogenic* classification is  $s \geq 0.5$  the mutation is predicted to be *Pathogenic*. In all the performance measures - assuming that positives indicate *Pathogenic* and negatives indicate *Benign* - TP (true positives) are correctly predicted *Pathogenic* Single Nucleotide Variants (SNVs), TN (true negatives) are correctly predicted *Benign* variants, FP (false positives) *Benign* SNVs annotated as *Pathogenic*, and FN (false negatives) are *Pathogenic* variants predicted to be *Benign*.

Predictor performance was evaluated using the following metrics: true positive and negative rates ( $TPR$ ,  $TNR$ ), positive and negative predicted values ( $PPV$ ,  $NPV$ ), score and overall accuracy ( $Q_2$ )

$$\begin{aligned}
 \text{Pathogenic: } PPV &= \frac{TP}{TP + FP} & TPR &= \frac{TP}{TP + FN} \\
 \text{Benign: } NPV &= \frac{TN}{TN + FN} & TNR &= \frac{TN}{TN + FP} \\
 Q_2 &= \frac{TP + TN}{TP + FP + TN + FN} & & [2]
 \end{aligned}$$

We computed the Matthew's correlation coefficient  $MCC$  (Eq. 2) as:

$$MCC = \frac{TP \times TN - FP \times FN}{\sqrt{(TP + FP)(TP + FN)(TN + FP)(TN + FN)}} \quad [3]$$

We also calculated the area under the receiver operating characteristic (ROC) curve (AUC), by plotting the True Positive Rate as a function of the False Positive Rate at different probability thresholds of annotating a variant as *Pathogenic* or *Benign*. PhD-SNP<sup>9</sup> calculates the False Discovery Rate (FDR) as a function of the returned output ( $s_0$ ).

$$\text{Pathogenic: } FDR(s > s_0) = \frac{FP}{FP + TP} \quad \text{Benign: } FDR(s < s_0) = \frac{FN}{FN + TN} \quad [4]$$

## Supplementary Tables

| <b>Dataset</b>       | <b>Database</b>                                             | <b># Variants</b> | <b># Filtered SNVs</b> | <b>Task</b>             |
|----------------------|-------------------------------------------------------------|-------------------|------------------------|-------------------------|
| <i>hd-pathogenic</i> | ClinVar (Jan 2016)                                          | 24,267            | 1,479                  | Optimization            |
| <i>dog-omia</i>      | OMIA (Nov 2018)                                             | 319               | 75                     | Validation              |
| <i>772Dogs</i>       | <a href="https://bit.ly/2KSB0LK">https://bit.ly/2KSB0LK</a> | 8,459,892         | 6,038,693              | Validation              |
| <i>Lym168</i>        | PMID: 25468570                                              | 172               | 168                    | Validation              |
| <i>dbsnp-benign</i>  | dbSNP (build 146)                                           | 5,648,530         | 3,051,393              | Optimization+Validation |

**Table S1.** Composition of the data sets used for optimizing and testing Fido-SNP. Database is the resource where the variation data are collected. # Variants: number of variants initially extracted from the databases. # Filtered SNVs: number of Single Nucleotide Variants for which the PhyloP11 conservation score is available.

## Supplementary Figures

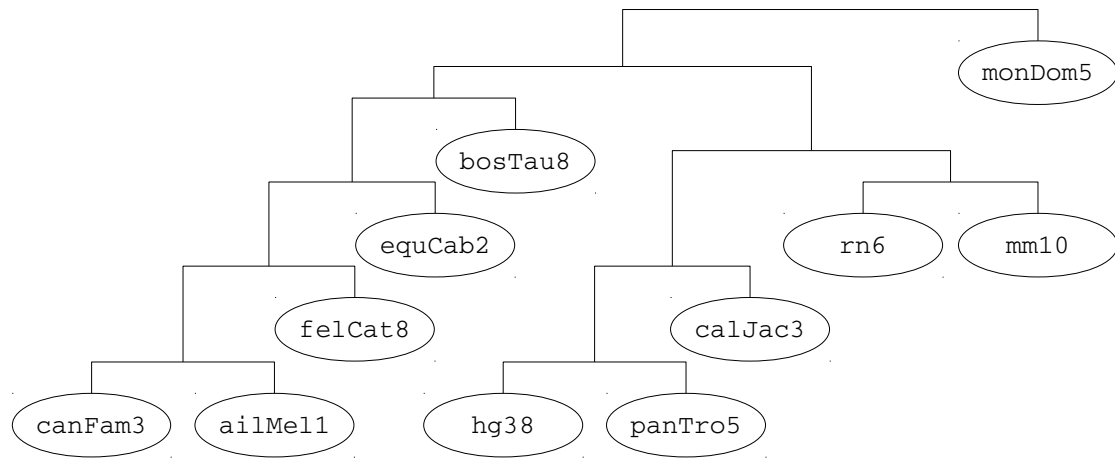

**Fig S1.** The phylogenetic tree used for the assembly of the pairwise alignments. The genomes of the 11 aligned species are: Dog (canFam3), Panda (ailMel1), Cow (bosTau8), Cat (felCat8) Horse (equCab2), Human (hg38), Mouse (mm10), Chimpanzee (panTro5), Rat (rn6) and Marmoset (calJac3) and Opossum (monDom5).
